# Supplementary material for: A comparison of ZnS and ZnSe passivation layers on CdS/CdSe co-sensitized quantum dot solar cells
Source: Royal Society of Chemistry journal article supplement (doi:10.1039/c6ta01590e), 2016-01-01
Supplement: c6ta01590e1.pdf [file c6ta01590e1.pdf]

## Supporting Information

Fei Huang,<sup>ab</sup> Qifeng Zhang,<sup>b</sup> Benke Xu,<sup>a</sup> Juan Hou,<sup>c</sup> Robert Masse,<sup>b</sup> Shanglong Peng,<sup>b</sup> Jianshe Liu,<sup>\*a</sup> Guozhong Cao<sup>\*b</sup>

<sup>a</sup>College of Environmental Science and Engineering, Donghua University, Shanghai 201620, P.R. China

<sup>b</sup>Department of Materials Science and Engineering, University of Washington, Seattle, Washington 98195-2120, United States

<sup>c</sup>Key Laboratory of Ecophysics and Department of Physics, School of Science, Shihezi University, Xinjiang 832003, P.R. China

\* Corresponding authors.

E-mail address: Jiansheliu@dhu.edu.cn

gzcao@u.washington.edu.

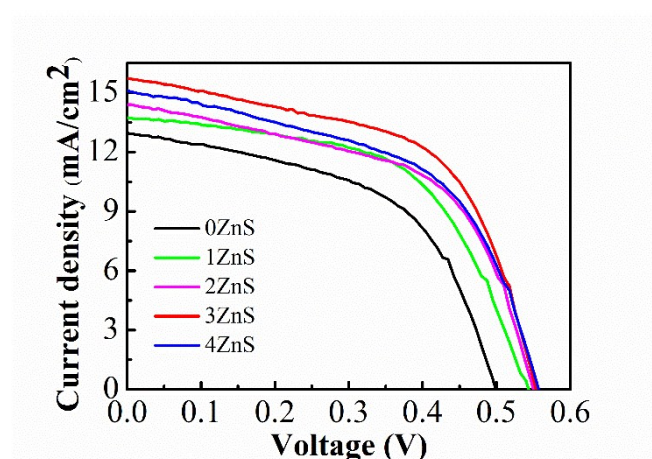

**Figure S1** Photocurrent density–voltage (J–V) curves of TiO<sub>2</sub>/CdS/CdSe QDSCs with various SILAR cycles of ZnS passivation layer measured under AM 1.5, 100 mW/cm<sup>2</sup> sunlight.

**Table S1** Photovoltaic properties obtained from the J–V curves with various ZnS passivation layer.

| Samples | V <sub>oc</sub> (V) | J <sub>sc</sub> (mA cm <sup>-2</sup> ) | FF   | η (%) |
|---------|---------------------|----------------------------------------|------|-------|
| 0ZnS    | 0.50                | 12.94                                  | 0.52 | 3.42  |
| 1ZnS    | 0.54                | 13.73                                  | 0.56 | 4.18  |
| 2ZnS    | 0.55                | 14.39                                  | 0.55 | 4.36  |
| 3ZnS    | 0.55                | 15.71                                  | 0.57 | 4.91  |
| 4ZnS    | 0.56                | 15.08                                  | 0.53 | 4.47  |

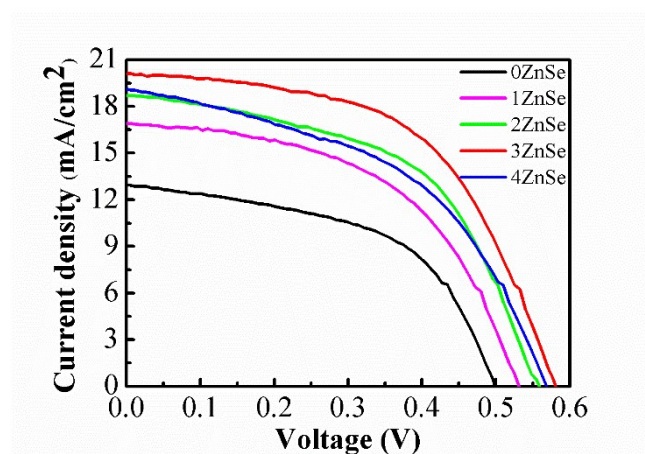

**Figure S2** Photocurrent density–voltage (J–V) curves of TiO<sub>2</sub>/CdS/CdSe QDSCs with various SILAR cycles of ZnSe passivation layer measured under AM 1.5, 100 mW/cm<sup>2</sup> sunlight.

**Table S2** Photovoltaic properties obtained from the J–V curves with various SILAR cycles of ZnSe passivation layer.

| Samples | V <sub>oc</sub> (V) | J <sub>sc</sub> (mA cm <sup>-2</sup> ) | FF   | η (%) |
|---------|---------------------|----------------------------------------|------|-------|
| 0ZnSe   | 0.50                | 12.94                                  | 0.52 | 3.42  |
| 1ZnSe   | 0.53                | 16.90                                  | 0.52 | 4.63  |
| 2ZnSe   | 0.56                | 18.70                                  | 0.53 | 5.51  |
| 3ZnSe   | 0.58                | 20.11                                  | 0.55 | 6.39  |
| 4ZnSe   | 0.57                | 19.12                                  | 0.48 | 5.18  |

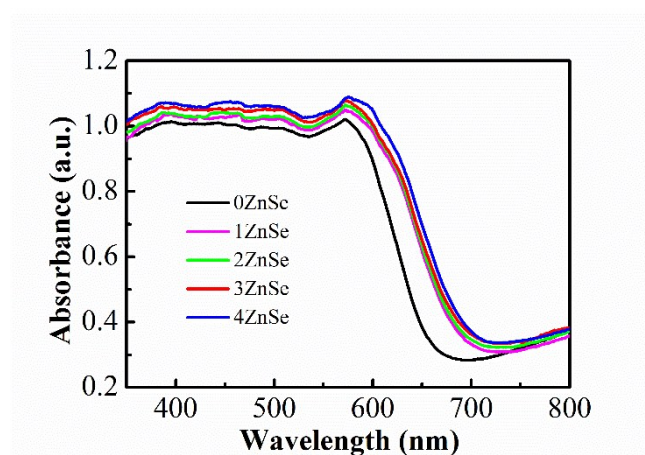

**Figure S3** UV-visible absorption spectra of TiO<sub>2</sub>/CdS/CdSe films with various SILAR cycles of ZnSe passivation layer.
